# Supplementary material for: Early-life supplementation of grape polyphenol extract promotes polyphenol absorption and modulates the intestinal microbiota in association with the increase in mRNA expression of the key intestinal barrier genes
Source: Royal Society of Chemistry journal article supplement (doi:10.1039/d0fo02231d), 2020-12-10
Supplement: d0fo02231d1.pdf [file d0fo02231d1.pdf]

**Table S1** The compositions of the normal calorie diet

| Compositions          | Normal diet |       |
|-----------------------|-------------|-------|
|                       | g%          | kcal% |
| Crude protein         | 19.10       | 22.17 |
| Crude fat             | 4.70        | 13.00 |
| Crude fiber           | 4.00        | 0.00  |
| Crude ash             | 6.20        | 0.00  |
| Moisture              | 8.90        | 0.00  |
| Calcium               | 1.18        | 0.00  |
| Total phosphorus      | 0.88        | 0.00  |
| Nitrogen free extract | 55.04       | 64.83 |

Table S2 Primers for qRT-PCR

| Name          | Sense                   | Antisense                | Reference |
|---------------|-------------------------|--------------------------|-----------|
| GAPDH         | GCCTTCCGTGTTCTACCC      | TGCCTGCTTCACCACCTTC      | 1         |
| LPH           | CAGCGATGCCACAGGAAAG     | ACGGAGCCCTTGACGAGAG      | 1         |
| Slc5a1        | TTGAATGGAACGCCTTGG      | GTGAAGATGTAGAGGAGCAG     | 1         |
| SULT1A1       | CCCGTCTATGCCCGGATAC     | GGGCTGGTGTCTCTTTCAGAGT   | 2         |
| UGT1A1        | TGAACTTCTACAGCGAGTGAAGA | GGGAATAAACCACTCTGCACATAA | 2         |
| UGT1A4        | CCTGCTGTGTTTTTTGGAGG    | ATTGATCCCAAAGAGAAAACCAC  | 3         |
| UGT1A6        | CCTTTGAAACAACCACTTTCTTC | CGACAATCATGTTGTTCTGTACTC | 2         |
| Occludin      | TTGAAAGTCCACCTCCTTACAGA | CCGGATAAAAAGAGTACGCTGG   | 4         |
| Jam-a         | CATGATGGTCCCCACCTC      | TCTGGCCTGGCAGTAGTAT      | 5         |
| ZO-1          | GATCCCTGTAAGTACCCAGA    | CTCCCTGCTTGCACTCTATC     | 4         |
| ZO-2          | CAGTCCCTATGCTGAGAGC     | TTGGAACCGCATAGATGTCA     | -         |
| Claudin-1     | AGGTCTGGCGACATTAGTGG    | CGTGGTGTGGGTAAGAGGT      | 6         |
| Claudin-2     | AGTGGCTGTAGTGGGTGGAG    | AAAGGATGACTCCGGCTACC     | -         |
| Claudin-3     | GAGATGGGAGCTGGGTGTA     | GTAGTCTTGCGGTCGTAGG      | -         |
| Muc1          | GGCATTGGGCTCCTTTCTT     | TGGAGTGGTAGTCGATGCTAAG   | 5         |
| Muc2          | ACGTGTCATATTGCACCTCT    | TCAACATTGAGAGTGCCAACT    | 7         |
| Muc3          | GGGGCAGAAGGGCGATAAG     | GGAGAACACGAGGAGGATCAC    | 5         |
| Relm $\beta$  | CTGATAGTCCCAGGGAACGC    | GTCTGCCAGAAGACGTGACA     | 5         |
| Reg3 $\gamma$ | CTGATAGTCCCAGGGAACGC    | GTCTGCCAGAAGACGTGACA     | 5         |

## References

- 1 B. Tjalling, M. W. Herbert, G. Marieke, N. D. Lauren, J.F. John, M.P. Christina, F. J. Gonzalez, T. E. Akiyama, R. K. Montgomery, R. J. Grand, S. D. Krasinski, Hepatocyte nuclear factor-1 $\alpha$  is required for expression but dispensable for histone acetylation of the lactase-phlorizin hydrolase gene in vivo, *Am. J. Physiol-Gaster. L.*, 2006, **290**, G1016-G1024.
- 2 C. H. Lee, Y. Ito, Y. Yanagiba, O. Yamanoshita, T. Nakajima, Pyrene-induced CYP1A2 and SULT1A1 may be regulated by car and not by ahr., *Toxicology*, 2007, **238**, 147-156.
- 3 M. Sakamoto, T. Itoh, R. H. Tukey, R. Fujiwara, Nicotine regulates the expression of udp-glucuronosyltransferase (UGT) in humanized UGT1 mouse brain, *Drug Metab. Pharmacok.*, 2015, **30**, 269-275.
- 4 W. Zhong, Y. Zhao, C. J. McClain, Y. J. Kang, Z. Zhou, Inactivation of hepatocyte nuclear factor-4 $\alpha$  mediates alcohol-induced downregulation of intestinal tight junction proteins, *Am. J. Physiol-Gastr. L.*, 2010, **299**, G643-G651.
- 5 G. Chen, X. Ran, B. Li, Y. Li, D. He, B. Huang, S. Fu, J. Liu, W. Wang, Sodium butyrate inhibits inflammation and maintains epithelium barrier integrity in a TNBS-induced inflammatory bowel disease mice model, *Ebiomedicine*, 2018, **30**, 317-325.

6 P. Wang, D. Li, W. Ke, L. Dong, X. Hu, F. Chen, Resveratrol-induced gut microbiota reduces obesity in high-fat diet-fed mice, *Int. J. Obesity*, 2020, **44**, 213-225.

7 F. F. Anhê, D. Roy, G. Pilon, S. Dudonné, S. Matamoros, T. V. Varin, C. Garofalo, Q. Moine, Y. Desjardins, L. Emile, M. André, A polyphenol-rich cranberry extract protects from diet-induced obesity, insulin resistance and intestinal inflammation in association with increased *Akkermansia* spp. population in the gut microbiota of mice, *Gut*, 2015, **64**, 872-883.
